# Supplementary material for: Involvement of CRMP2 in Regulation of Mitochondrial Morphology and Motility in Huntington’s Disease
Source: MDPI journal article supplement (doi:10.3390/cells10113172), 2021-11-15
Supplement: s1 [file s1]

SUPPLEMENTARY MATERIALS

To Figure 1A

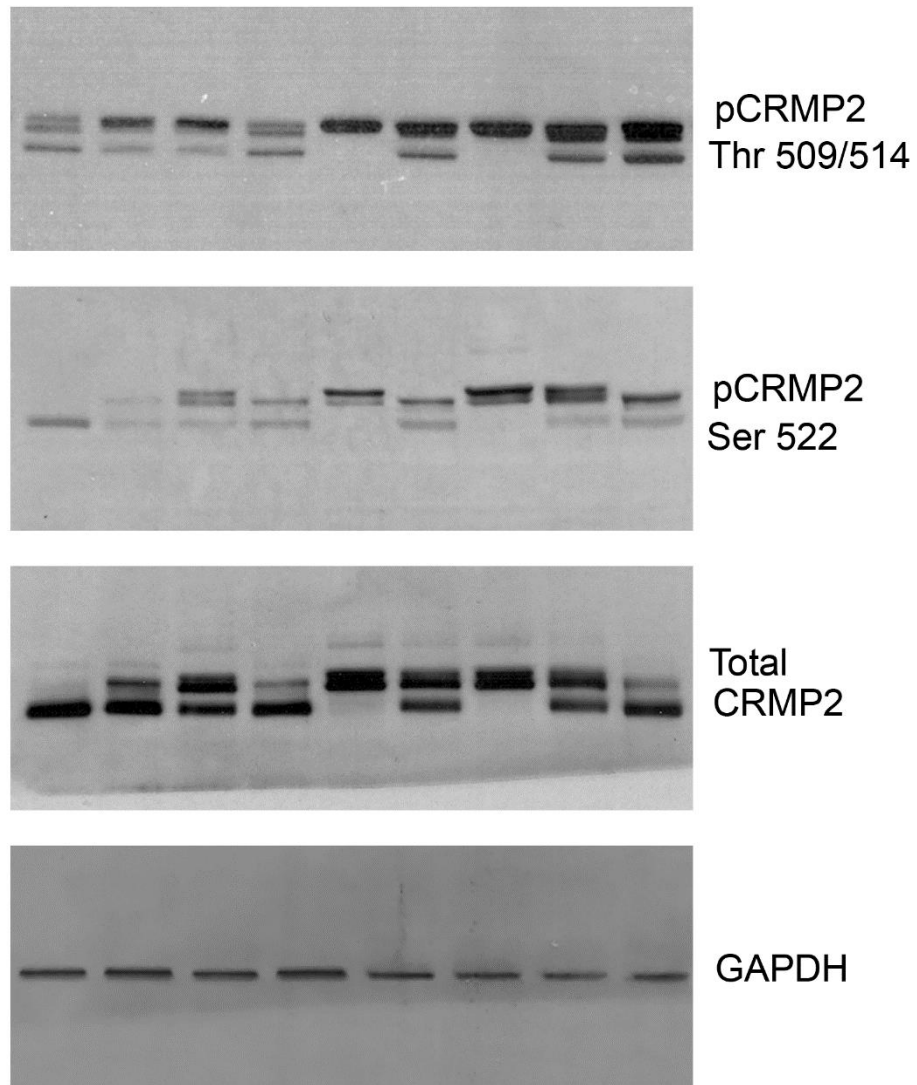

Figure S1. The unedited images of immunoblots for Figure 1A.

To Figure 2G

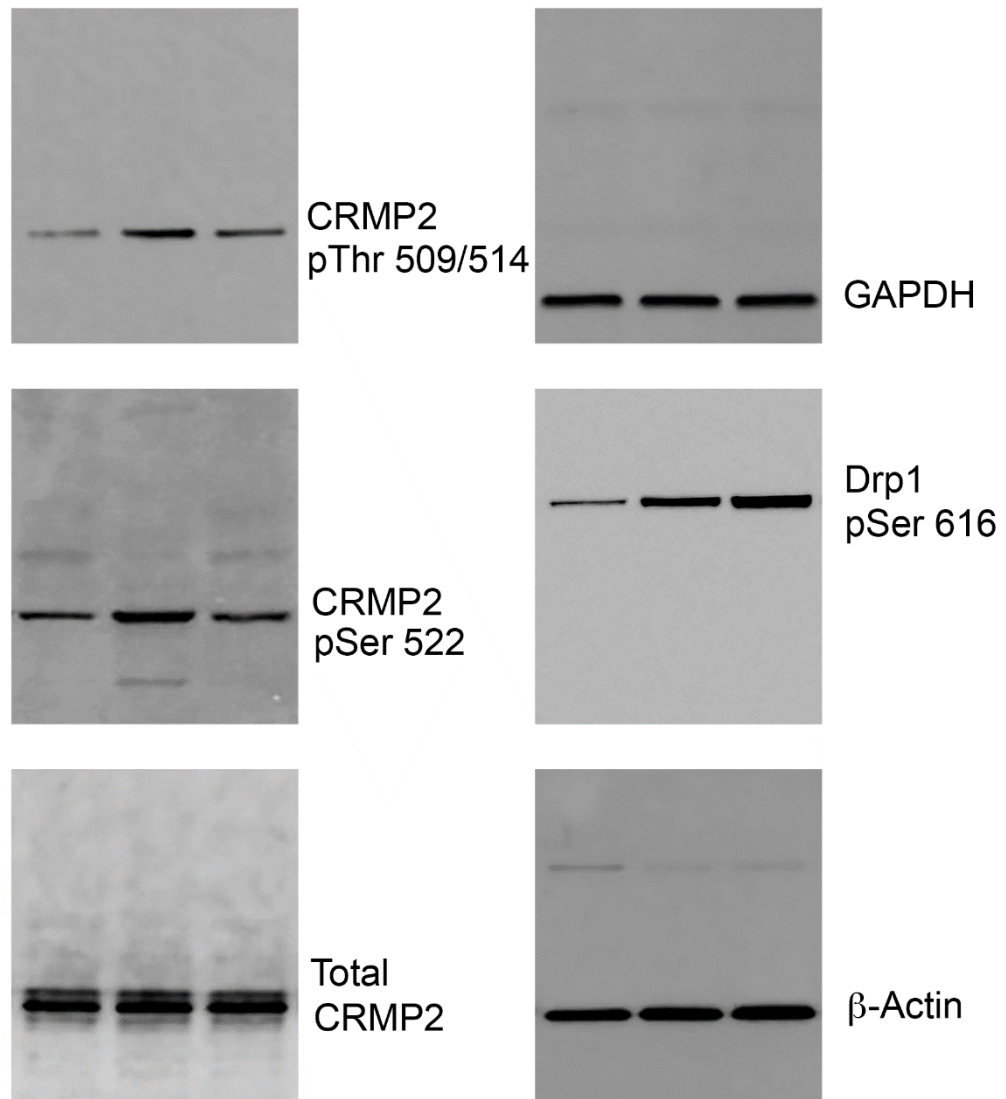

Figure S2. The unedited images of immunoblots for Figure 2G.

To Figure 3A and B

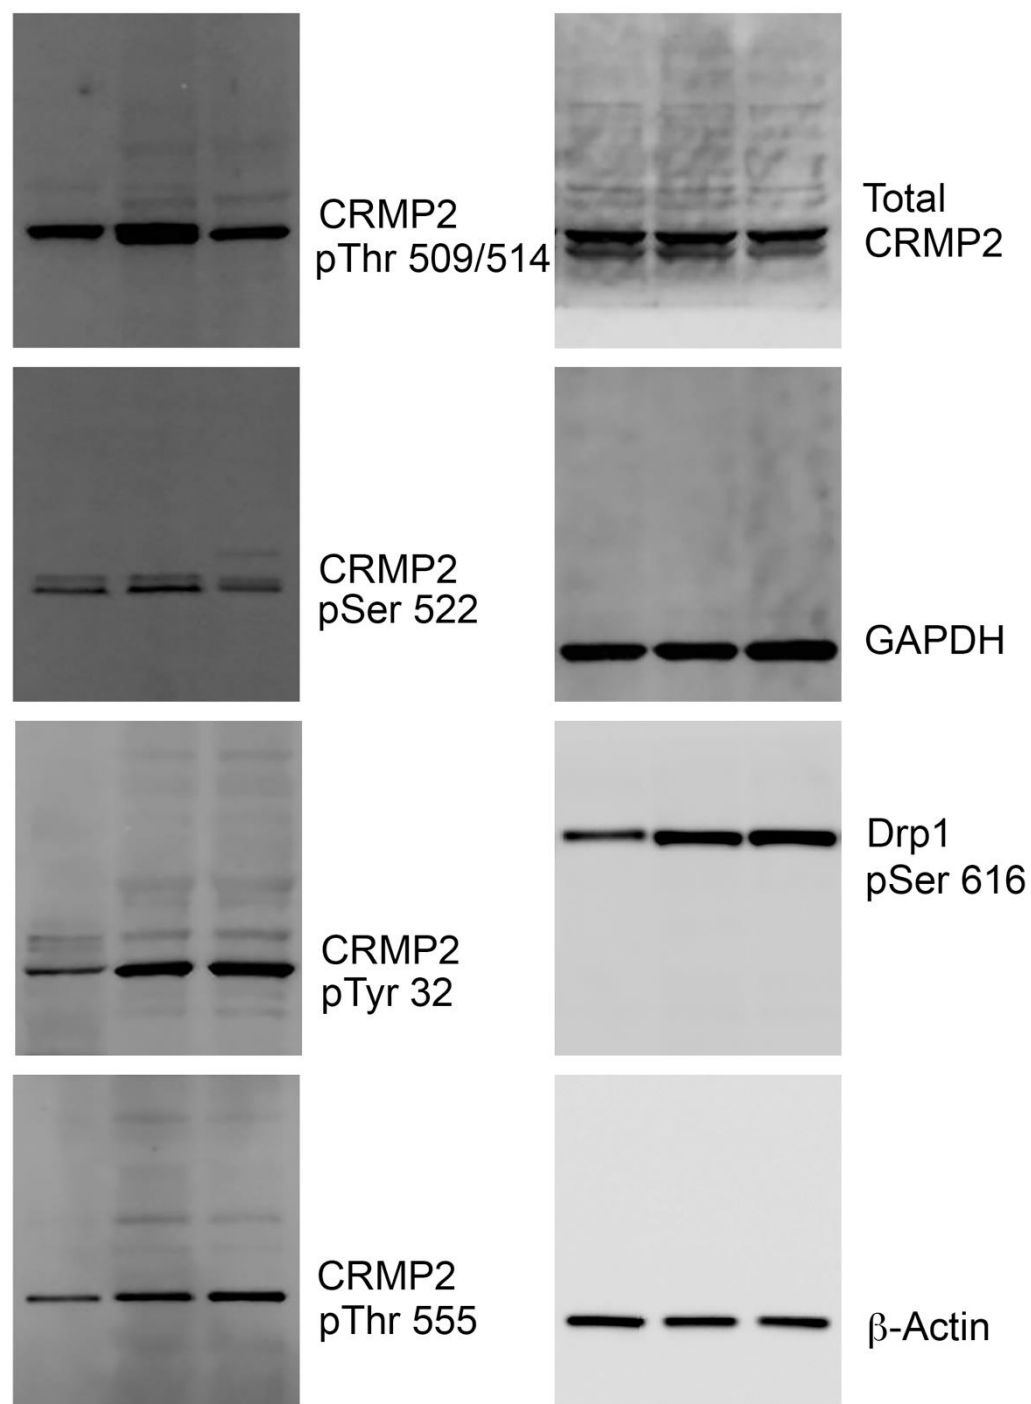

Figure S3. The unedited images of immunoblots for Figure 3A and B.

To Figure 4A.

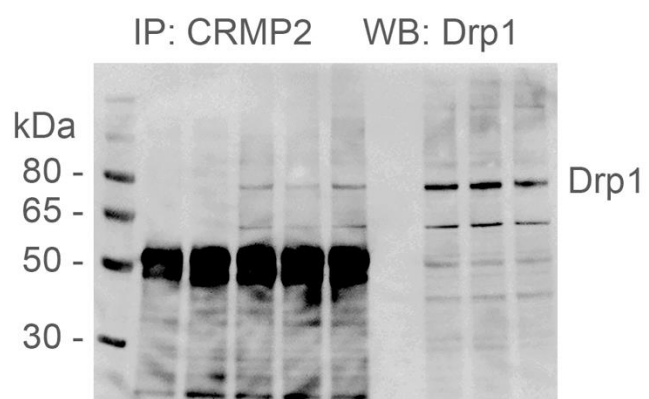

To Figure 4B.

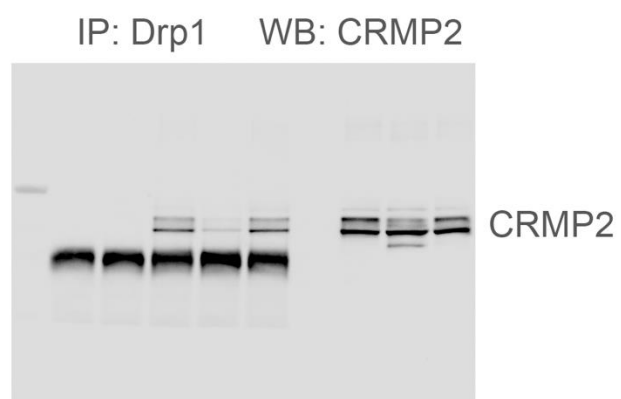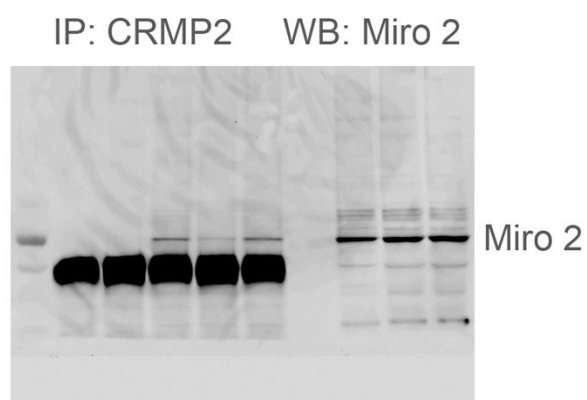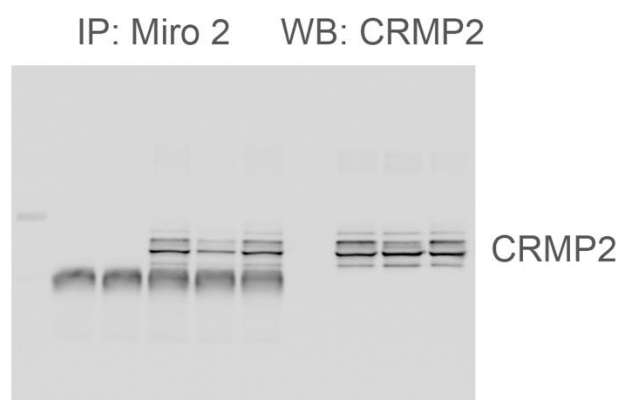

Figure S4. The unedited images of immunoblots for Figure 4A and B.

Supplemental Table S1.

**Main characteristics of human postmortem brain samples**

| <u>Sample ID#</u> | <u>Assigned #</u> | <u>Age</u> | <u>Postmortem<br/>Interval (hrs)</u> | <u>Race</u> | <u>Sex</u> | <u>CAG,<br/>number</u> | <u>Grade</u> |
|-------------------|-------------------|------------|--------------------------------------|-------------|------------|------------------------|--------------|
| Control           |                   |            |                                      |             |            |                        |              |
| 5028              | 1                 | 67         | 18                                   | W           | M          | n/d                    | -            |
| 4324              | 2                 | 62         | 18                                   | B           | F          | n/d                    | -            |
| 5404              | 3                 | 50         | 17                                   | W           | M          | n/d                    | -            |
| 5080              | 4                 | 61         | 14                                   | B           | F          | n/d                    | -            |
| HD Patients       |                   |            |                                      |             |            |                        |              |
| 5199              | 1                 | 67         | 13                                   | W           | M          | 44/19                  | 2            |
| 5217              | 2                 | 55         | 10                                   | W           | M          | 49/21                  | 2            |
| 5413              | 3                 | 43         | 10                                   | W           | M          | 51/19                  | 2            |
| 5104              | 4                 | 61         | 16                                   | W           | F          | 47/15                  | 1            |
| 4514              | 5                 | 69         | 10                                   | W           | F          | 46/17                  | 2-3          |

n/d – not determined
